# Dynamic changes in natural killer cell subset frequencies in the absence of cytomegalovirus infection

Ivayla E. Gyurova<sup>1,2</sup>, Heinrich Schlums<sup>3</sup>, Heidi Sucharew<sup>4,5</sup>, Lilliam Ambroggio<sup>6</sup>, Hannah Than Win<sup>1</sup>, Yenan T. Bryceson<sup>3</sup>, David I. Bernstein<sup>5,7</sup>, Stephen N. Waggoner<sup>1,2,5</sup>

<sup>1</sup>Center for Autoimmune Genomics and Etiology, Cincinnati Children's Hospital Medical Center, Cincinnati, OH, USA, <sup>2</sup>Pathobiology and Molecular Medicine Graduate Program, University of Cincinnati College of Medicine, Cincinnati, OH, USA, <sup>3</sup>Center for Hematology and Regenerative Medicine, Department of Medicine, Karolinska Institutet, Karolinska University Hospital Huddinge, Stockholm, Sweden, <sup>4</sup>Division of Biostatistics and Epidemiology, Cincinnati Children's Hospital Medical Center, Cincinnati, OH, USA, <sup>5</sup>Department of Pediatrics, University of Cincinnati College of Medicine, Cincinnati, OH, USA, <sup>6</sup>Sections of Emergency Medicine and Hospital Medicine, Children's Hospital Colorado, Department of Pediatrics, University of Colorado Denver, Denver, CO, USA, <sup>7</sup>Division of Infectious Diseases, Cincinnati Children's Hospital Medical Center, Cincinnati, OH, USA

E-mail: [Stephen.Waggoner@cchmc.org](mailto:Stephen.Waggoner@cchmc.org)

**Individuals lacking functional natural killer (NK) cells suffer severe, recurrent infections with cytomegalovirus (CMV), highlighting the critical role of NK cells in antiviral defense. Therefore, ongoing attempts to develop an efficacious vaccine to prevent CMV infection should potentially aim to elicit NK-cell antiviral responses as an accessory to conventional T- and B-cell based approaches. In this regard, CMV infection provokes marked phenotypic and functional differentiation of the NK-cell compartment, including development of adaptive NK cells that exhibit enhanced antiviral activity. We examined longitudinal blood samples collected from 40 CMV-seronegative adolescents to ascertain whether a CMV glycoprotein B (gB) vaccine can stimulate differentiation or expansion of CMV-associated subsets of NK cells. Study participants uniformly lacked the CMV-dependent NKG2C<sup>high</sup> subset of NK cells, suggesting that an adjuvanted CMV gB vaccine is an inadequate stimulus for sustained expansion of these cells. In contrast, we observed unexpected dynamic fluctuations in the frequency of NK cells lacking FcR $\gamma$ , EAT-2, and SYK, which were independent of vaccination or CMV infection. These results suggest that frequencies of some NK cell subsets may increase in response to unknown environmental or inflammatory cues, where greater understanding of the nature of such signals should permit vaccine-driven expansion of CMV-reactive NK cells.**

Vaccine | HCMV | Innate lymphoid cell | NK cell | Memory | CD56 | CD57 | FcR $\gamma$  | SYK | NKG2C | EAT-2

---

## Introduction

Cytomegalovirus (CMV) is a significant global cause of morbidity and physical impairment, with manifestations of infection ranging from subclinical disease to death. Congenital infection and the infection of immunocompromised patients, including transplant recipients, represent the most severe consequences of CMV in the human population. Congenital CMV accounts for roughly 400 deaths and more than 5,000 developmentally impaired children each year in the United States [1]. Therefore, effective strategies to prevent or control infection are desperately needed.

Unfortunately, CMV has proven to be a challenging target for vaccine development. To date, most CMV vaccine efforts focus on elicitation of antibodies against viral glycoproteins or generation of antiviral T-cell responses. Administration of a MF59-adjuvanted CMV glycoprotein B (gB) vaccine to CMV-seronegative adolescent girls induced strong gB-specific antibody responses and afforded 43% protective efficacy [2]. The same vaccine conferred short-lived, 50% protection, against CMV infection in seronegative post-partum women [3] and reduced post-transplant viral load when given to patients

awaiting a kidney or liver transplant [4]. While promising, these results indicate that humoral responses against gB may be insufficient to effectively prevent CMV infection in many individuals. DNA vaccines aimed at eliciting CMV-reactive T cells have also afforded minimal protection in a transplant patient-based clinical trial [5]. These advances prompted development of new vaccines aimed at eliciting both humoral and cellular immunity [6], but it remains unclear whether other arms of the immune response must be engaged to effectively prevent CMV infection.

Natural killer (NK) cells are critical antiviral effectors that produce IFN- $\gamma$  [7], lyse virus-infected cells [8], and regulate adaptive immune responses [9-14]. NK cells play an important role in control of CMV infection in both mice and humans [15, 16]. Since NK cells lack the somatically rearranged antigen-specific receptors characteristic of T and B cells, and because they were previously thought to be short-lived cells [17], vaccine triggering of NK cells has historically been considered of little value. However, recent data suggests that the innate immune system makes important contributions to vaccine-elicited protection against infection [18]. Specifically, long-lived populations of adaptive NK cells with antigen-specific features similar to those of memory T cells have emerged as potential new targets of vaccines aimed at preventing CMV infection [19-22].

Immunological memory in virus-specific NK cells is widely described in the context of murine CMV. In C57BL/6 mice, a mouse CMV gene product engages an activating NK cell receptor, Ly49H (*Klra8*), promoting clonal expansion and contraction of the Ly49H-expressing subset of NK cells [23-27]. Thereafter, a subset of memory Ly49H<sup>+</sup> NK cells with enhanced antiviral effector functions persists indefinitely [28]. Similar types of adaptive NK cells develop in response to hapten sensitization [29], vaccinia virus infection [30], and virus-like particle immunization of mice [31]. Likewise, simian immunodeficiency virus-reactive memory NK cells develop in rhesus macaques after virus infection or immunization [32]. Collectively, animal studies point to existence of long-lived, virus-dependent subpopulations of memory NK cells that are likely better antiviral effectors than their naïve counterparts.

Several types of memory NK cells have been characterized in humans. These include memory NK cells induced by cytokines [33], varicella zoster virus exposure [34], antibody-mediated stimulation [35], or CMV-derived peptides [36]. High frequencies of NK cells expressing the activating receptor NKG2C are frequently observed in CMV seropositive individuals [37]. These NKG2C<sup>high</sup> cells undergo proliferative expansion during primary CMV infection in transplant patients [38] and in response to CMV-infected fibroblasts [39], IL-12-producing infected monocytes [40], and CMV UL40-derived peptides [36]. CMV-associated adaptive NK cells expressing NKG2C display altered DNA methylation patterns and reduced expression of signaling molecules, including FcR $\gamma$ , spleen tyrosine kinase (SYK), and EWS/FLI1-associated transcript 2 (EAT-2) [41, 42]. CMV-associated NK cell expansions with reduced expression of FcR $\gamma$ , SYK, and/or EAT-2 generally lack expression of the transcription factor PLZF and may also express activating KIR or lack DAP12-coupled receptors altogether. NK cells with reduced expression of FcR $\gamma$ , SYK, or EAT-2 are also detected in CMV seronegative individuals, with 10% of individuals displaying significant expansions of this population. These phenotypic changes are linked to more potent antibody-dependent activation, expansion, and function of these adaptive NK cells relative to other NK-cell subsets.

The crucial function of NK cells in immune defense against CMV coupled with the discovery that distinct subsets of NK cells emerge after infection, collectively suggest that targeted induction of these subsets of NK cells during immunization may provide enhanced protection against CMV infection. The capacity of existing vaccines to elicit transient or sustained expansion of CMV-associated human NK

**Table 1. Patient Demographics.** Age, race, and ethnicity of female subjects who received placebo or gB/MF59 vaccine (n=20 per group).

|                                    | gB/MF59 | Placebo  | Total |
|------------------------------------|---------|----------|-------|
| # subjects                         | 20      | 20       | 40    |
| Age Category at Vaccination, n (%) |         |          |       |
| 12-15 years                        | 14 (70) | 11 (55)  | 25    |
| 15-17 years                        | 6 (30)  | 9 (45)   | 15    |
| Race, n (%)                        |         |          |       |
| Black                              | 7 (35)  | 7 (35)   | 14    |
| Caucasian                          | 12 (60) | 11 (55)  | 23    |
| Other                              | 1 (5)   | 2 (10)   | 3     |
| Ethnic Origin, n (%)               |         |          |       |
| Hispanic/Latino                    | 1 (5)   | 0 (0)    | 1     |
| Not                                | 19 (95) | 20 (100) | 39    |

cells has not been reported. In this study, we interrogate longitudinal peripheral blood mononuclear cell (PBMC) samples collected from MF59-adjuvanted CMV glycoprotein B (gB) vaccine or placebo recipients who locally participated in clinical trial NCT00133497 [2]. Our study reveals vaccine-independent oscillation of FcR $\gamma$ <sup>neg</sup> NK cell frequencies, but not those of NKG2C<sup>high</sup> NK cells, in human blood from CMV seronegative individuals. These findings provoke re-evaluation of the paradigm concerning NK-cell subset dynamics in humans.

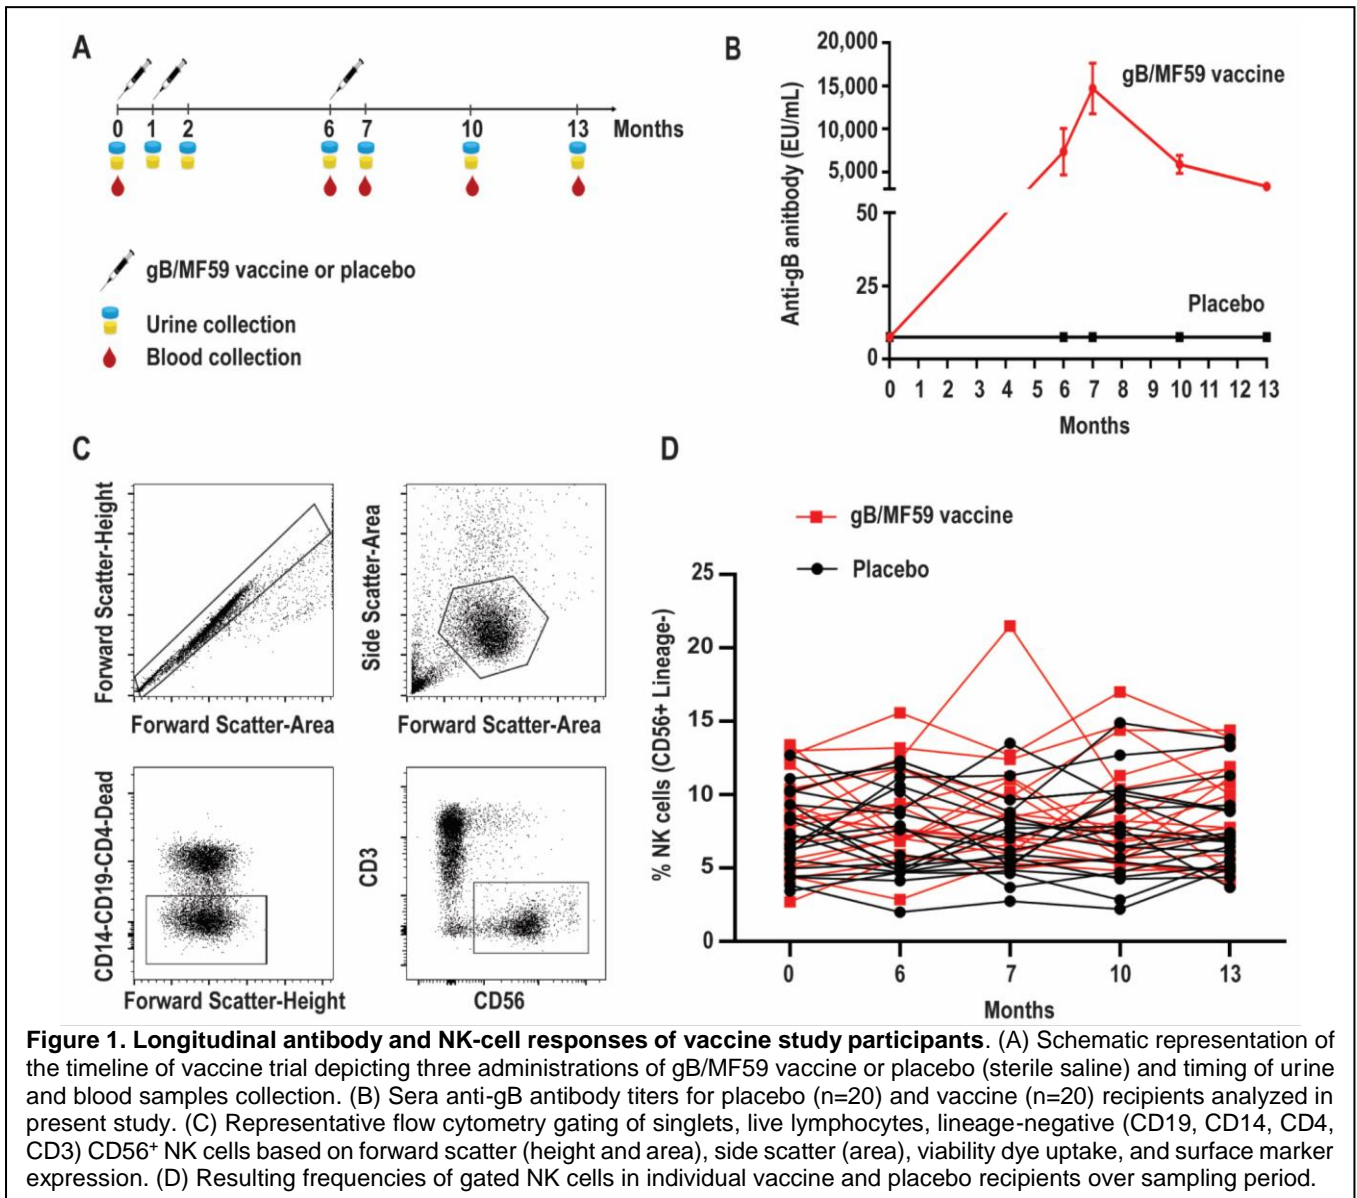

## Results

**Vaccine trial cohort.** To determine whether CMV vaccination strategies can trigger emergence of CMV-associated NK cell subsets, we examined a longitudinal series of PBMC from a subset (n=40, **Table 1**) of CMV vaccine trial participants (NCT00133497) for whom a full set of samples were available. Half of the study participants received three intramuscular injections of CMV gB in MF59 adjuvant while the placebo group was administered sterile saline in place of the vaccine (**Figure 1A**). Vaccine recipients exhibited a robust gB-specific antibody response (**Figure 1B**). None of the selected 40 study participants acquired CMV infection during the study period, as measured by PCR testing for CMV in urine and for seroconversion against non-vaccine CMV antigens [2].

**Minimal variation in NK-cell frequencies over time.** We first assessed the proportion of total NK cells (CD56<sup>+</sup> CD3<sup>-</sup> CD19<sup>-</sup> CD14<sup>-</sup> CD4<sup>-</sup>) in PBMC. **Figure 1C** depicts the gating scheme used to identify NK cells in our samples. There was a broad range (2.0-21.5%) of NK-cell proportions across study

participants and across sampling time points (**Figure 1D**). The mean proportion of NK cells across all time points is similar in groups receiving placebo or vaccine (Placebo=7.4%, Vaccine=8.6%,  $p=0.16$ ), while the changes in NK cell proportions over time between the placebo or vaccine group were not statistically significantly different ( $p=0.71$ ).

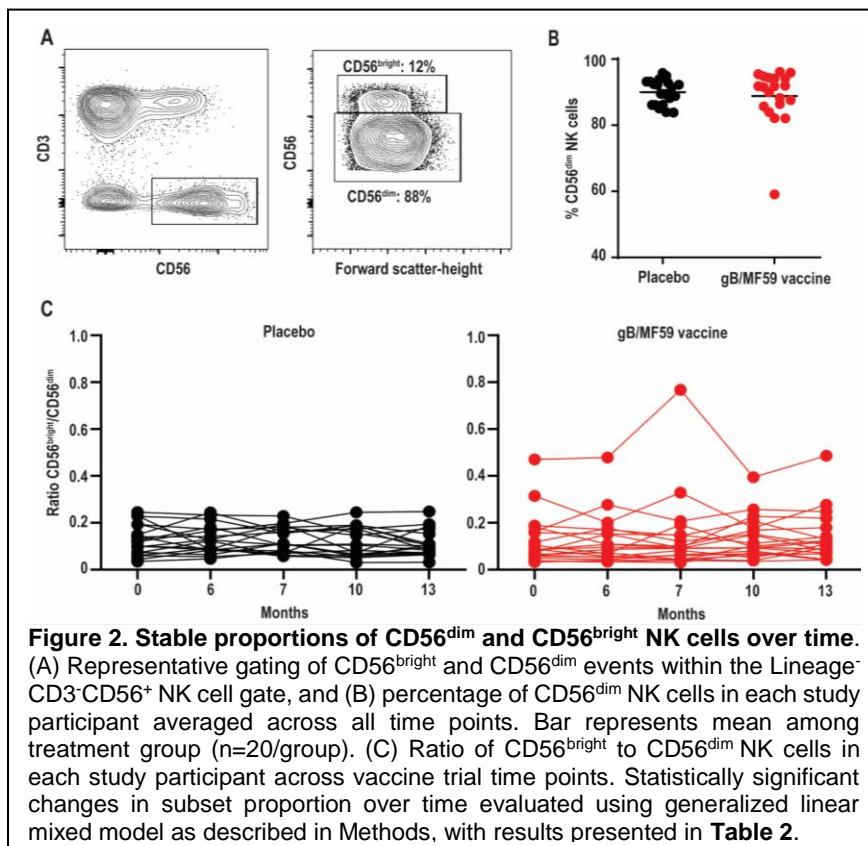

NK cells can be stratified based on CD56 expression into CD56<sup>dim</sup> and CD56<sup>bright</sup> subsets (**Figure 2A**) that exhibit distinct phenotypic and functional characteristics [43]. The CD56<sup>dim</sup> subset comprises a mean  $88.8 \pm 1.14\%$  (average of all time points) of circulating NK cells in study participants (**Figure 2B**), where the ratio between CD56<sup>bright</sup> and CD56<sup>dim</sup> cells in vaccine and placebo groups is relatively consistent over study time points (**Figure 2C**). Specifically, time did not modify the effect between the placebo and vaccine groups regarding CD56<sup>dim</sup> cell counts ( $p=0.38$ ). In addition, neither time ( $p=0.97$ ) nor treatment group (mean vaccine: 6.50% (95% CI: 5.34%, 7.91%); mean placebo: 5.51% (95% CI: 4.51%, 6.74%),  $p=0.24$ ) were independently associated with CD56<sup>dim</sup> cell counts. For CD56<sup>bright</sup> cell counts, time modified the effect of placebo

and vaccine groups ( $p=0.01$ ); wherein CD56<sup>bright</sup> count increased by a factor of 1.25 (95% CI: 1.07, 1.46,  $p=0.01$ ) in the vaccine group but the change in the placebo group was not statistically significant (**Table 2**).

**Absence of CMV-dependent NKG2C<sup>high</sup> NK-cell subset.** High frequencies of NKG2C-expressing NK cells have been almost exclusively observed in CMV seropositive individuals [37]. This subset expands after CMV reactivation in organ or tissue transplant recipients [38], and reflects activation of this subset by CMV UL40-derived peptides coupled with pro-inflammatory cytokines [36]. Due to the confirmed CMV negative status of vaccine trial participants throughout the duration of the vaccine study and the absence of UL40 antigens in the vaccine formulation, we hypothesized that NKG2C<sup>high</sup> NK cell frequencies would be low at all time points. Using a positive control PBMC sample known to contain NKG2C<sup>high</sup> NK cells [42], we confirmed that our staining protocol can effectively detect this subset (**Figure 3A**). As expected, NKG2C<sup>high</sup> NK cells were largely undetectable in all vaccine trial participants at baseline and the average absolute change in frequency from baseline proportions of this subset hardly varied across time in both placebo (0.046-0.409% range of mean absolute change from baseline visit) and vaccine (-0.830-0.956% range of mean absolute change from baseline visit) recipients (**Figure 3B**). Analysis of additional samples from vaccine trial participants (n=3) at time points after natural acquisition of CMV infection (confirmed by PCR & seroconversion to non-vaccine CMV antigens) remained negative for NKG2C<sup>high</sup> NK cells over the study timeframe (data not shown).

**CMV- and vaccine-independent dynamic changes in NK-cell subset frequencies.** Expanded subsets of NK cells that lose expression of FcR $\gamma$ , EAT-2, and/or SYK are expanded in approximately half of CMV seropositive individuals but can also be observed in seronegative donors, albeit less commonly ( $\leq 10\%$  of individuals) and at much lower frequencies [41, 42]. As these subsets can expand upon Fc receptor engagement by antibody [35, 41], we hypothesized that robust antibody responses against vaccine

antigens may trigger accumulation of these subsets after vaccine prime and boost administration. We could detect NK cells within the CD56<sup>dim</sup> subset that exhibited loss of FcR $\gamma$  expression (**Figure 4A**). These FcR $\gamma$ <sup>neg</sup> NK cells concomitantly lacked EAT-2 and SYK expression in most study participants relative to FcR $\gamma$ <sup>+</sup> NK cell counterparts (**Figure 4A**).

Interestingly, we detected a progressive increase in the frequency of FcR $\gamma$ <sup>neg</sup> NK cells following prime and boost immunization in a subset of vaccine recipients (**Figure 4B**). However, a similar pattern was observed in some placebo recipients. Moreover, the majority of individuals given vaccine (n=11) or placebo (n=10) exhibited transient expansions and contractions in the frequency of FcR $\gamma$ <sup>neg</sup> NK cells over time (**Figure 4C**). A smaller number of individuals in both groups demonstrated FcR $\gamma$ <sup>neg</sup> NK cells at baseline that disappeared over time, or lacked this subset of cells entirely (**Figure 4C**). High-dimensional analysis with t-SNE confirmed FcR $\gamma$ <sup>neg</sup> NK cells largely cluster as one subset, the frequency of which changes over time within the selected study participant (**Figure 4D**).

**Distinct CD57 expression on FcR $\gamma$ <sup>neg</sup> NK cells in absence of CMV.** While the proportions of FcR $\gamma$ <sup>neg</sup> NK cells vary among individuals and at different time points, the percentage of NK cells expressing other receptors associated with CMV infection, including CD57 (range 10-54%) or NKG2A (range 20-84%), exhibited little variation across time (**Figure 5A**). In fact, no statistically significant differences in CD57 (p=0.96) or NKG2A (p=0.75) expression were observed over time between both placebo and vaccine

**Table 2. Change in NK cell CD56<sup>bright</sup> and CD56<sup>dim</sup> subsets over time.** Mean (95% confidence interval) percentage of CD56<sup>dim</sup> and CD56<sup>bright</sup> cells by time and treatment group.

|                                                     | Placebo Mean (95% CI) | Vaccine Mean (95% CI) |
|-----------------------------------------------------|-----------------------|-----------------------|
| CD56 <sup>Dim</sup> (interaction p-value = 0.38)    |                       |                       |
| 0 m                                                 | 5.95% (4.73%, 7.50%)  | 6.20% (4.95%, 7.76%)  |
| 6 m                                                 | 5.41% (4.29%, 6.81%)  | 6.34% (5.07%, 7.94%)  |
| 7 m                                                 | 5.15% (4.09%, 6.49%)  | 6.99% (5.58%, 8.75%)  |
| 10 m                                                | 5.41% (4.30%, 6.82%)  | 6.45% (5.15%, 8.07%)  |
| 13 m                                                | 5.67% (4.49%, 7.16%)  | 6.53% (5.21%, 8.20%)  |
| CD56 <sup>Bright</sup> (interaction p-value = 0.01) |                       |                       |
| 0 m                                                 | 0.62% (0.50%, 0.77%)  | 0.58% (0.47%, 0.72%)  |
| 6 m                                                 | 0.61% (0.49%, 0.76%)  | 0.60% (0.48%, 0.74%)  |
| 7 m                                                 | 0.60% (0.49%, 0.75%)  | 0.69% (0.56%, 0.86%)  |
| 10 m                                                | 0.55% (0.44%, 0.68%)  | 0.70% (0.57%, 0.87%)  |
| 13 m                                                | 0.59% (0.47%, 0.73%)  | 0.72% (0.58%, 0.90%)  |

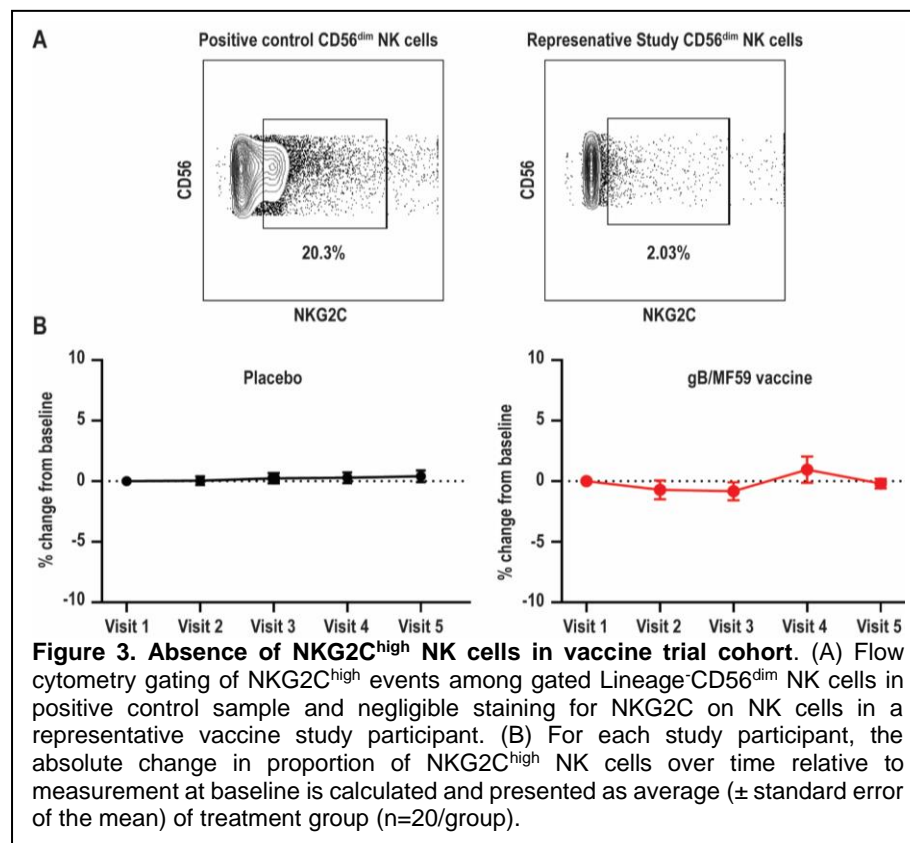

groups. The temporally stable but heterogeneous expression of CD57 and NKG2A among individuals in the present study is consistent with prior observations [44]. As CMV infection is associated with increased expression of CD57 and down-regulation of NKG2A [45], most notably among FcR $\gamma$ <sup>neg</sup> [35] and NKG2C<sup>high</sup> [46] NK cells, the expression of these receptors was examined on the NK-cell subsets in vaccine trial participants (**Figure 5B**). FcR $\gamma$ <sup>neg</sup> NK cells detected in CMV-negative individuals in this study segregated as NKG2A<sup>low</sup> relative to FcR $\gamma$ <sup>+</sup> cells (**Figure 5B**), consistent with previous studies [35, 42]. However, FcR $\gamma$ <sup>neg</sup> NK cells were not enriched for expression of the (**Figure 5B**). In fact, that totality

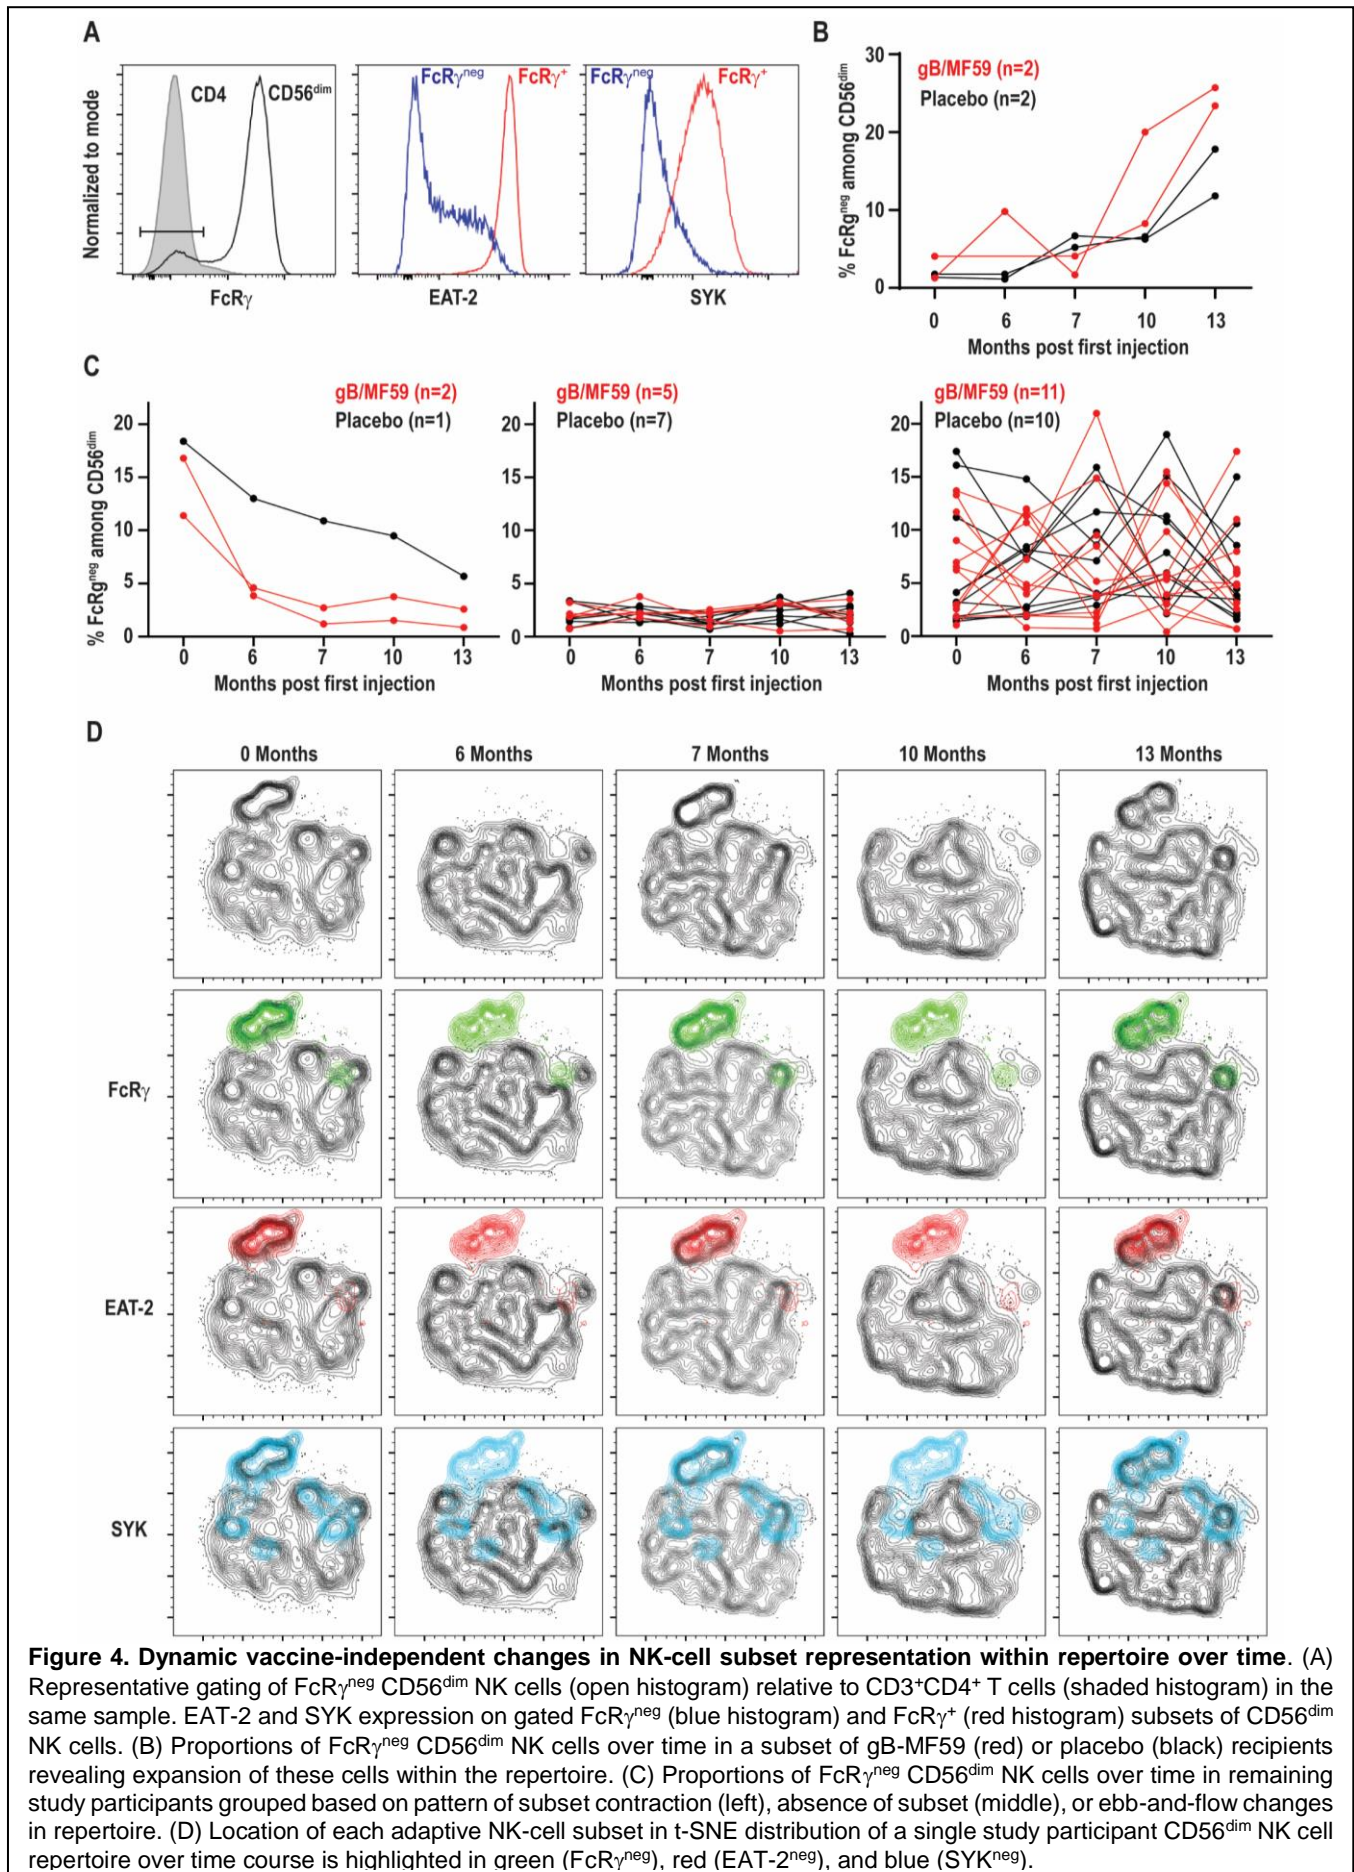

of  $FcR\gamma^{neg}$  NK cells observed across time points and individuals in this study expressed less CD57 than their  $FcR\gamma^{+}$  counterparts (**Figure 5C**). Thus,  $FcR\gamma^{neg}$  NK cells are more prevalent in the NK-cell repertoire in this longitudinally examined study cohort and frequently exhibit dynamic changes in frequency over time as well as distinct CD57 expression patterns relative to  $FcR\gamma^{neg}$  NK cells in CMV infected individuals.

## Discussion

Past cross-sectional analyses suggest that adaptive subsets of NK cells are rarely present in the absence of CMV infection, whereas the frequencies of these adaptive NK cells are markedly increased in the majority of CMV seropositive individuals [41, 42, 46-48]. The present longitudinal analysis of NK cells in healthy CMV-negative individuals affirms the lack of NKG2C-expressing NK cells in CMV-naïve persons [42], yet challenges the paradigm that the  $FcR\gamma^{neg}$  NK cell subset is infrequent or absent in CMV seronegative individuals. In contrast to the current prototype, the majority of the healthy, demonstrably CMV-negative adolescent women profiled in this clinical study exhibit measurable frequencies of  $FcR\gamma^{neg}$  NK cells during at least one study time point, with dynamic changes in the frequency of these cells among circulating NK cells over time. Changes in frequencies of these subsets did not correlate with vaccine administration or vaccine-antigen-specific antibody titers, suggesting that undefined environmental factors promote oscillations in the representation of these subsets among total circulating NK cells.

The low frequencies of NKG2C-expressing NK cells across all time points in the forty vaccine trial participants is consistent with absence of CMV infection of these individuals and the purported link between CMV gene products and expansion of this subset of NK cells [49-51]. Within the limitations of our sampling scheme, these results also support the hypothesis that CMV gB and MF59 are insufficient to stimulate differentiation or accumulation of NKG2C<sup>high</sup> NK cells. Since CMV UL40-derived peptides presented by HLA-E are critically required for HCMV-driven NKG2C expansion [36], incorporation of UL40 into next generation vaccines may more effectively elicit NKG2C<sup>high</sup> memory NK cell expansion.

In contrast to both the tight link between CMV and NKG2C<sup>high</sup> NK cells and the reported rarity of  $FcR\gamma^{neg}$  NK cells in CMV-seronegative individuals, the present longitudinal data suggest that the latter NK cell subset may be commonly present in some NK-cell repertoires and can exhibit dynamic changes in frequency. The majority (28 out of 40) CMV seronegative individual in our study exhibited populations of  $FcR\gamma^{neg}$  NK cells greater than 10% during at least one of the five time points analyzed over a year-long study period. These data contrast a previous cross-sectional studies which found expansions of NK cells lacking  $FcR\gamma$ , EAT-2, and/or SYK in 6/69 adults [42]. The fraction of study participants scoring positive for  $FcR\gamma^{neg}$  NK cell subsets at any given time point in our study ranged from 30% to 45%, suggesting that

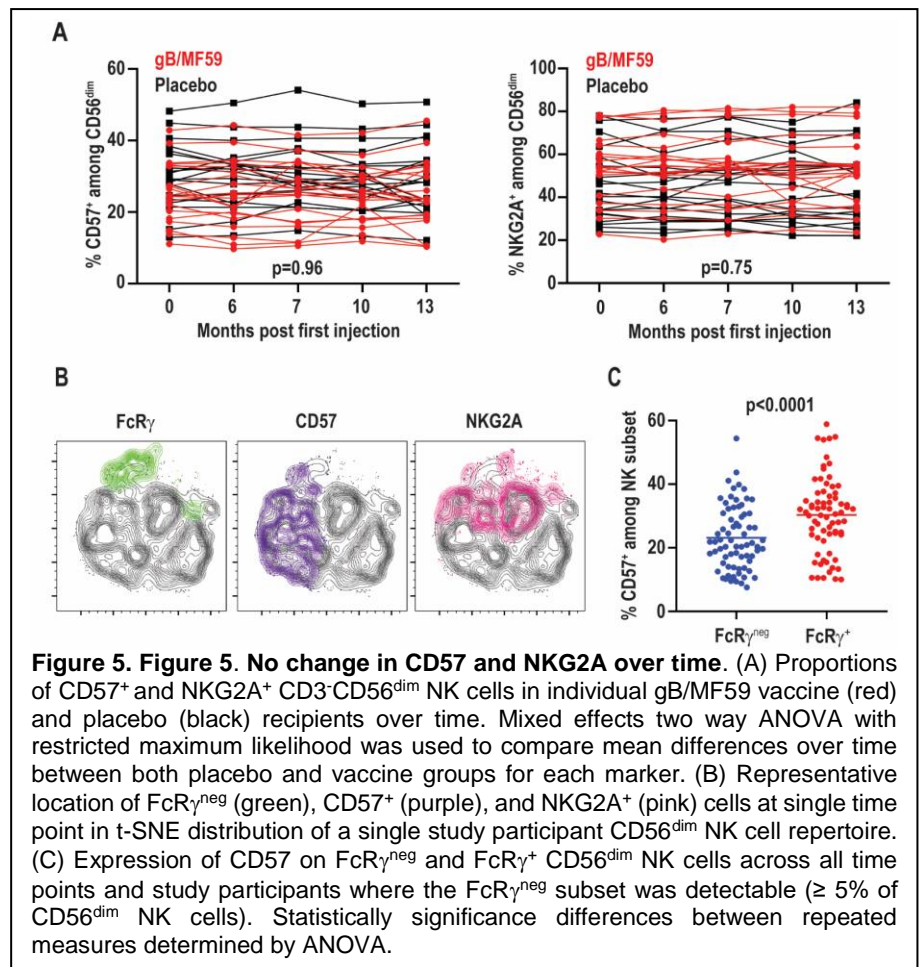

additional factors may distinguish the two study populations. Moreover, the FcR $\gamma^{\text{neg}}$  NK cells measured in this study appear to differ from those observed in CMV-infected individuals with regards to expression of the maturation marker CD57 [35, 42, 46, 52]. As CD57 expression on NK cells is putatively linked to increased cytolytic potential, decreased sensitivity to inflammatory cytokines, and reduced proliferative potential [53], this phenotypic disparity of FcR $\gamma^{\text{neg}}$  populations of NK cells in the absence of CMV may reflect important functional distinctions as well.

A major distinction of the present study population is the restriction to analysis of adolescent females. The influence of puberty-associated hormones and other pediatric variables on adaptive NK cell subsets is unknown. Therefore, it is possible that the present longitudinal study reveals dynamics of NK cell subsets that are unique to adolescents, or even adolescent females, that are not shared by adult CMV seronegative populations. Of note, NK cells express the alpha and beta estrogen receptors (ER $\alpha$  and ER $\beta$ ) and exhibit function alterations in response to estrogen [54, 55]. Moreover, while KIR, CD57, and NKG2A expression on NK cells remains stable across menstruation cycles [44, 56], the stability of the FcR $\gamma^{\text{neg}}$  NK cell subset in this setting is less clear. Therefore, increased prevalence of CMV-associated NK cells or dynamic variation in the frequencies of the cells may reflect hormonal changes or environmental influences that are unique to or more common in adolescent females.

Besides these differences in age and gender of our study population, the participants in the CMV vaccine trial also exhibited a greater degree of racial diversity than was represented in previous cross-sectional studies [42]. Specifically, 35% of our vaccine trial participants were Black (i.e. African American). Although race assuredly impacts the NK-cell repertoire in the context of highly polymorphic receptors, including killer-cell immunoglobulin-like receptors (KIR), the effects of race on CMV-reactive NK cells and receptors associated with these subsets are less well defined. Intriguingly, 100% (15 of 15) of Black study participants demonstrated detectable FcR $\gamma^{\text{neg}}$  NK cells at one or more time points of study, whereas only 58% (14 of 24) of Caucasian study participants exhibited FcR $\gamma^{\text{neg}}$  NK cells in their repertoire. Thus, gender, race, genetics, and local environmental factors may all contribute to the distinct observations of adaptive NK cell frequencies in our study.

A key unanswered question concerns the nature of the stimuli provoking longitudinal changes in frequency of NK cell subsets. A recent study of barcoded hematopoietic cells in rhesus macaques noted significant fluctuations in the clonal composition of NK cells over time [57]. Our study stringently controlled for CMV exposure via urine and blood analyses [2]. Moreover, the results do not support a relationship between CMV gB vaccination or gB-specific antibody titers and altered frequencies of NK cell subsets. Nonetheless, other subclinical acute infections, vaccinations (e.g. seasonal influenza vaccine), inflammatory events, environmental exposures (i.e. allergens), or shifts in microbiota composition could alter the composition of the NK-cell repertoire. We speculate that these environmental stimuli or associated immune responses (i.e. antibody elaboration) provoke the expansion, differentiation, or release of FcR $\gamma^{\text{neg}}$  NK cells into the circulation. The elevated frequency of these NK cell subsets in CMV-positive individuals may reflect an altered tempo or magnitude of these natural oscillations, or a greater regularity of the instigating stimulus. Alternatively, as the frequencies of these subsets appear to be more stable in CMV-seropositive individuals [38], aspects of the inflammatory environment during chronic CMV infection may more efficiently maintain these populations. Given that the MF59 adjuvant used in this CMV vaccine is designed for optimal stimulation of T and B-cell responses, future studies aimed at ascertaining the nature of inflammatory cues promoting adaptive NK cells will yield key insights into the types of adjuvants that may be applied to intentionally promote sustained expansion of these NK cell subsets in next generation vaccines.

Our results, to our knowledge, represent the first longitudinal study of CMV-associated NK-cell subsets in healthy CMV seronegative individuals. Here, we had the unique ability to gain insight into the intra-individual variation in the frequency of NK-cell subsets following gB/MF59 vaccination. We show that the lack of change in NKG2C expression was consistent with absence of CMV infection, confirming the stringent association of this virus with NKG2C $^{\text{high}}$  NK cells. However, we also present evidence suggesting that presence of FcR $\gamma^{\text{neg}}$ , EAT-2 $^{\text{neg}}$ , and SYK $^{\text{neg}}$  NK cells in the repertoire may be more temporally dynamic and CMV-independent than previously thought. Future work examining age and gender related



differences as well as longitudinal analyses of post-transplant patients may give further insight into the variegated expression of CMV-associated NK-cell subsets.

## Materials and Methods

**CMV vaccine trial:** This study was approved by the Cincinnati Children's Hospital Medical Center Institutional Review Board and conducted by the Cincinnati Vaccine and Treatment Evaluation Unit (VTEU) as part of CMV vaccine trial NCT00133497. Study participants were 12- to 17-year-old healthy adolescent females confirmed CMV seronegative at the start of the study. Only samples from the Cincinnati site of this clinical trial were available for the purposes of the present study. Furthermore, only those subjects with available samples spanning trial duration were used for experimental analyses. As a result, a total of 40 participants were randomized into two groups (n=20/group) receiving either 3 doses of CMV gB subunit vaccine in MF59 adjuvant (20 µg gB and 10.75 mg MF59, Sanofi Pasteur) or sterile saline (Sodium chloride 0.9%) placebo by intramuscular injection in the deltoid on days 0, 30, and 180 of protocol [2]. Urine, saliva and blood were collected throughout time course to assess CMV infection by PCR and seroconversion to non-vaccine CMV antigens, respectively. The 40 subjects evaluated longitudinally in the present study remained CMV negative throughout sampling period. Three additional vaccine trial participants who were part of the placebo group and became positive for CMV infection during longitudinal sampling period were used to examine NK-cell subset frequencies at time points subsequent to natural acquisition of CMV infection. Peripheral blood mononuclear cells (PBMC) were collected and cryopreserved at screening and various times (days 0, 1, 30, 60, 180 and 210) of trial [2].

**NK-cell analyses:** PBMC were concomitantly stained and assessed by flow cytometry during a single experimental run (or block). A volunteer blood donor with a high percentage of NKG2C<sup>high</sup> NK cells extraneous to vaccine trial was selected as a positive control for NKG2C staining and included in each block of vaccine trial participant samples to benchmark stain validity and reproducibility. Expression of FcR<sub>γ</sub>, SYK, and EAT-2 are benchmarked against CD4 T cells in the same sample, where the latter cells do not express these proteins [42]. Phenotypic analyses of PBMCs were performed using fluorochrome-conjugated antibodies. Cells were stained for surface markers using CD3 (OKT3, Biolegend), CD19 (HIB19, BD Biosciences), CD4 (RPA-T4, BD Biosciences), CD14 (M5E2, BD Biosciences), CD56 (N901, Beckman Coulter), NKG2C (REA205, Miltenyi Biotech), NKG2A (Z199, Beckman Coulter), CD57 (HCD57, Biolegend) and a fixable live-dead stain (Pacific Green, Invitrogen) in FACS buffer (HBSS supplemented with 5% fetal bovine serum and 2 µm EDTA). Following surface staining, cells were fixed in 2% paraformaldehyde (Fisher Scientific) and permeabilized with 0.04% Triton X-100 (Sigma Aldrich). Intracellular staining in FACS buffer with 2% bovine serum albumin was then performed to identify FcR<sub>γ</sub> (polyclonal rabbit, Millipore), EAT-2 (polyclonal rabbit, ProteinTech Group), SYK (4D10.1, eBioscience) markers. Intracellular EAT-2 staining was followed by secondary staining with polyclonal anti-rabbit IgG (Invitrogen). Flow cytometric data were obtained using an LSR Fortessa instrument (BD Biosciences) and analyzed via FlowJo\_v10 software (Treestar).

**T-distributed stochastic neighbor embedding (t-SNE) analyses:** The tSNE algorithm of FlowJo\_v10 was used to visualize dimensionality of NK cell subsets over time. For each donor, the data at individual time point was down sampled (gated on CD56<sup>dim</sup> NK cells) and then concatenated to create three dimensionally reduced t-SNE plots. Populations expressing or lacking various proteins were overlaid on t-SNE plots to identify subset clusters.

**Statistical analyses:** Differences between placebo and vaccine recipients were compared using mixed effects two way ANOVA with restricted maximum likelihood. Changes over time (0, 6, 7, 10, and 13 months) and treatment group (placebo and vaccine) in the proportion of CD56<sup>bright</sup> and CD56<sup>dim</sup> cells were evaluated using generalized linear mixed models with a Poisson distribution, log link function, and an offset of the logarithm of the total NK cell count specified. A random intercept and a random slope and an interaction term between time and treatment group was included in the model. Graphs were generated using GraphPad Prism and statistical tests were performed in Prism and SAS 9.4 (SAS Institute Inc., Cary NC).

## Author contribution

IG: conception and design of study, execution of experiments, acquisition of data, analysis and interpretation of data, drafting of the manuscript. HS: analysis and interpretation of data, critical revision of the manuscript. HJS and LA: statistical analyses and critical revision of the manuscript. HW: execution of experiments. YB: analysis and interpretation of results, critical revision of the manuscript. DB: conception and design of study, sample collection and regulatory approvals, critical revision of manuscript. SW: conception and design of study, analysis and interpretation of data, drafting and critical revision of the manuscript, obtained funding, study supervision.

## Acknowledgements

This research was supported by the Cincinnati Children's Research Foundation and the National Center for Advancing Translational Sciences of the National Institutes of Health (NIH) under Award Number UL1 TR001425. Investigators on this project are supported by NIH grants AI125413 (L.A.), DA038017, AI148080 and AR073228 (S.N.W.). The original clinical trial was supported by NIH contract HHSN272200800006C (D.I.B.). The Cincinnati Children's Flow Cytometry Core is supported by NIH grants AR047363, AR070549, DK078392, DK090971, S10OD025045 and S10OD023410. Y.T.B. is supported by European Research Council under the European Union's Seventh Framework Program (FP/2007-2013)/ERC Grant Agreement no. 311335, the Swedish Research Council, Norwegian Research Council, Swedish Foundation for Strategic Research, Wallenberg Foundation, Swedish Cancer Foundation, Swedish Childhood Cancer Foundation, and the Stockholm County Council and Karolinska Institutet Center for Innovative Medicine. We would like to thank G. Hart (U. Minnesota) for insights into the staining protocol for FcR $\gamma$ <sup>neg</sup> EAT-2<sup>neg</sup> SYK<sup>neg</sup> NK cells.

## References

1. Dollard, S.C., S.D. Grosse, and D.S. Ross, New estimates of the prevalence of neurological and sensory sequelae and mortality associated with congenital cytomegalovirus infection. *Rev Med Virol*, 2007. 17(5): p. 355-63.
2. Bernstein, D.I., F.M. Munoz, S.T. Callahan, R. Rupp, S.H. Wootton, K.M. Edwards, C.B. Turley, L.R. Stanberry, S.M. Patel, M.M. McNeal, S. Pichon, C. Amegashie, and A.R. Bellamy, Safety and efficacy of a cytomegalovirus glycoprotein B (gB) vaccine in adolescent girls: A randomized clinical trial. *Vaccine*, 2016. 34(3): p. 313-9.
3. Pass, R.F., C. Zhang, A. Evans, T. Simpson, W. Andrews, M.L. Huang, L. Corey, J. Hill, E. Davis, C. Flanagan, and G. Cloud, Vaccine prevention of maternal cytomegalovirus infection. *N Engl J Med*, 2009. 360(12): p. 1191-9.
4. Griffiths, P.D., A. Stanton, E. McCarrell, C. Smith, M. Osman, M. Harber, A. Davenport, G. Jones, D.C. Wheeler, J. O'Beirne, D. Thorburn, D. Patch, C.E. Atkinson, S. Pichon, P. Sweny, M. Lanzman, E. Woodford, E. Rothwell, N. Old, R. Kinyanjui, T. Haque, S. Atabani, S. Luck, S. Prideaux, R.S. Milne, V.C. Emery, and A.K. Burroughs, Cytomegalovirus glycoprotein-B vaccine with MF59 adjuvant in transplant recipients: a phase 2 randomised placebo-controlled trial. *Lancet*, 2011. 377(9773): p. 1256-63.
5. Vincenti, F., K. Budde, P. Merville, F. Shihab, V. Ram Peddi, M. Shah, K. Wyburn, E. Casuto-Viguier, A. Weidemann, M. Lee, T. Flegel, J. Erdman, X. Wang, and C. Lademacher, A randomized, phase 2 study of ASP0113, a DNA-based vaccine, for the prevention of CMV in CMV-seronegative kidney transplant recipients receiving a kidney from a CMV-seropositive donor. *Am J Transplant*, 2018. 18(12): p. 2945-2954.
6. John, S., O. Yuzhakov, A. Woods, J. Deterling, K. Hassett, C.A. Shaw, and G. Ciaramella, Multi-antigenic human cytomegalovirus mRNA vaccines that elicit potent humoral and cell-mediated immunity. *Vaccine*, 2018. 36(12): p. 1689-1699.
7. Orange, J.S., B. Wang, C. Terhorst, and C.A. Biron, Requirement for natural killer cell-produced interferon gamma in defense against murine cytomegalovirus infection and enhancement of this defense pathway by interleukin 12 administration. *J Exp Med*, 1995. 182(4): p. 1045-56.
8. Santoli, D., G. Trinchieri, and F.S. Lief, Cell-mediated cytotoxicity against virus-infected target cells in humans. I. Characterization of the effector lymphocyte. *J Immunol*, 1978. 121(2): p. 526-31.
9. Pallmer, K. and A. Oxenius, Recognition and Regulation of T Cells by NK Cells. *Front Immunol*, 2016. 7: p. 251.
10. Schuster, I.S., J.D. Coudert, C.E. Andoniou, and M.A. Degli-Esposti, "Natural Regulators": NK Cells as Modulators of T Cell Immunity. *Front Immunol*, 2016. 7: p. 235.
11. Cook, K.D., S.N. Waggoner, and J.K. Whitmire, NK cells and their ability to modulate T cells during virus infections. *Crit Rev Immunol*, 2014. 34(5): p. 359-88.
12. Crome, S.Q., P.A. Lang, K.S. Lang, and P.S. Ohashi, Natural killer cells regulate diverse T cell responses. *Trends Immunol*, 2013. 34(7): p. 342-9.

13. Welsh, R.M. and S.N. Waggoner, NK cells controlling virus-specific T cells: Rheostats for acute vs. persistent infections. *Virology*, 2013. 435(1): p. 37-45.
14. Crouse, J., U. Kalinke, and A. Oxenius, Regulation of antiviral T cell responses by type I interferons. *Nat Rev Immunol*, 2015. 15(4): p. 231-42.
15. Bukowski, J.F., B.A. Woda, S. Habu, K. Okumura, and R.M. Welsh, Natural killer cell depletion enhances virus synthesis and virus-induced hepatitis in vivo. *J Immunol*, 1983. 131(3): p. 1531-8.
16. Biron, C.A., K.S. Byron, and J.L. Sullivan, Severe herpesvirus infections in an adolescent without natural killer cells. *N Engl J Med*, 1989. 320(26): p. 1731-5.
17. Zhang, Y., D.L. Wallace, C.M. de Lara, H. Ghattas, B. Asquith, A. Worth, G.E. Griffin, G.P. Taylor, D.F. Tough, P.C. Beverley, and D.C. Macallan, In vivo kinetics of human natural killer cells: the effects of ageing and acute and chronic viral infection. *Immunology*, 2007. 121(2): p. 258-65.
18. Netea, M.G., L.A. Joosten, E. Latz, K.H. Mills, G. Natoli, H.G. Stunnenberg, L.A. O'Neill, and R.J. Xavier, Trained immunity: A program of innate immune memory in health and disease. *Science*, 2016. 352(6284): p. aaf1098.
19. Sun, J.C. and L.L. Lanier, Natural killer cells remember: an evolutionary bridge between innate and adaptive immunity? *Eur J Immunol*, 2009. 39(8): p. 2059-64.
20. Paust, S. and U.H. von Andrian, Natural killer cell memory. *Nat Immunol*, 2011. 12(6): p. 500-8.
21. Cooper, M.A. and W.M. Yokoyama, Memory-like responses of natural killer cells. *Immunol Rev*, 2010. 235(1): p. 297-305.
22. Vivier, E., D.H. Raulet, A. Moretta, M.A. Caligiuri, L. Zitvogel, L.L. Lanier, W.M. Yokoyama, and S. Ugolini, Innate or adaptive immunity? The example of natural killer cells. *Science*, 2011. 331(6013): p. 44-9.
23. Lee, S.H., S. Girard, D. Macina, M. Busa, A. Zafer, A. Belouchi, P. Gros, and S.M. Vidal, Susceptibility to mouse cytomegalovirus is associated with deletion of an activating natural killer cell receptor of the C-type lectin superfamily. *Nat Genet*, 2001. 28(1): p. 42-5.
24. Brown, M.G., A.O. Dokun, J.W. Heusel, H.R. Smith, D.L. Beckman, E.A. Blattenberger, C.E. Dubbelde, L.R. Stone, A.A. Scalzo, and W.M. Yokoyama, Vital involvement of a natural killer cell activation receptor in resistance to viral infection. *Science*, 2001. 292(5518): p. 934-7.
25. Arase, H., E.S. Mocarski, A.E. Campbell, A.B. Hill, and L.L. Lanier, Direct recognition of cytomegalovirus by activating and inhibitory NK cell receptors. *Science*, 2002. 296(5571): p. 1323-6.
26. Daniels, K.A., G. Devora, W.C. Lai, C.L. O'Donnell, M. Bennett, and R.M. Welsh, Murine cytomegalovirus is regulated by a discrete subset of natural killer cells reactive with monoclonal antibody to Ly49H. *J Exp Med*, 2001. 194(1): p. 29-44.
27. Dokun, A.O., S. Kim, H.R. Smith, H.S. Kang, D.T. Chu, and W.M. Yokoyama, Specific and nonspecific NK cell activation during virus infection. *Nat Immunol*, 2001. 2(10): p. 951-6.
28. Sun, J.C., J.N. Beilke, and L.L. Lanier, Adaptive immune features of natural killer cells. *Nature*, 2009. 457(7229): p. 557-61.
29. O'Leary, J.G., M. Goodarzi, D.L. Drayton, and U.H. von Andrian, T cell- and B cell-independent adaptive immunity mediated by natural killer cells. *Nat Immunol*, 2006. 7(5): p. 507-16.
30. Gillard, G.O., M. Bivas-Benita, A.H. Hovav, L.E. Grandpre, M.W. Panas, M.S. Seaman, B.F. Haynes, and N.L. Letvin, Thy1+ NK [corrected] cells from vaccinia virus-primed mice confer protection against vaccinia virus challenge in the absence of adaptive lymphocytes. *PLoS Pathog*, 2011. 7(8): p. e1002141.
31. Paust, S., H.S. Gill, B.Z. Wang, M.P. Flynn, E.A. Moseman, B. Senman, M. Szczepanik, A. Telenti, P.W. Askenase, R.W. Compans, and U.H. von Andrian, Critical role for the chemokine receptor CXCR6 in NK cell-mediated antigen-specific memory of haptens and viruses. *Nat Immunol*, 2010. 11(12): p. 1127-35.
32. Reeves, R.K., H. Li, S. Jost, E. Blass, H. Li, J.L. Schafer, V. Varner, C. Manickam, L. Eslamizar, M. Altfeld, U.H. von Andrian, and D.H. Barouch, Antigen-specific NK cell memory in rhesus macaques. *Nat Immunol*, 2015. 16(9): p. 927-32.
33. Cooper, M.A., J.M. Elliott, P.A. Keyel, L. Yang, J.A. Carrero, and W.M. Yokoyama, Cytokine-induced memory-like natural killer cells. *Proc Natl Acad Sci U S A*, 2009. 106(6): p. 1915-9.
34. Nikzad, R., L.S. Angelo, K. Aviles-Padilla, D.T. Le, V.K. Singh, L. Bimler, M. Vukmanovic-Stejic, E. Vendrame, T. Ranganath, L. Simpson, N.L. Haigwood, C.A. Blish, A.N. Akbar, and S. Paust, Human natural killer cells mediate adaptive immunity to viral antigens. *Sci Immunol*, 2019. 4(35).
35. Zhang, T., J.M. Scott, I. Hwang, and S. Kim, Cutting edge: antibody-dependent memory-like NK cells distinguished by FcRgamma deficiency. *J Immunol*, 2013. 190(4): p. 1402-6.
36. Hammer, Q., T. Ruckert, E.M. Borst, J. Dunst, A. Haubner, P. Durek, F. Heinrich, G. Gasparoni, M. Babic, A. Tomic, G. Pietra, M. Nienen, I.W. Blau, J. Hofmann, I.K. Na, I. Prinz, C. Koenecke, P. Hemmati, N. Babel, R. Arnold, J. Walter, K. Thurley, M.F. Mashreghi, M. Messerle, and C. Romagnani, Peptide-specific recognition of human cytomegalovirus strains controls

- adaptive natural killer cells. *Nat Immunol*, 2018. 19(5): p. 453-463.
37. Guma, M., M. Budt, A. Saez, T. Brckalo, H. Hengel, A. Angulo, and M. Lopez-Botet, Expansion of CD94/NKG2C+ NK cells in response to human cytomegalovirus-infected fibroblasts. *Blood*, 2006. 107(9): p. 3624-31.
38. Beziat, V., L.L. Liu, J.A. Malmberg, M.A. Ivarsson, E. Sohlberg, A.T. Bjorklund, C. Retiere, E. Sverremark-Ekstrom, J. Traherne, P. Ljungman, M. Schaffer, D.A. Price, J. Trowsdale, J. Michaelsson, H.G. Ljunggren, and K.J. Malmberg, NK cell responses to cytomegalovirus infection lead to stable imprints in the human KIR repertoire and involve activating KIRs. *Blood*, 2013. 121(14): p. 2678-88.
39. Guma, M., A. Angulo, C. Vilches, N. Gomez-Lozano, N. Malats, and M. Lopez-Botet, Imprint of human cytomegalovirus infection on the NK cell receptor repertoire. *Blood*, 2004. 104(12): p. 3664-71.
40. Rolle, A., J. Pollmann, E.M. Ewen, V.T. Le, A. Halenius, H. Hengel, and A. Cerwenka, IL-12-producing monocytes and HLA-E control HCMV-driven NKG2C+ NK cell expansion. *J Clin Invest*, 2014. 124(12): p. 5305-16.
41. Lee, J., T. Zhang, I. Hwang, A. Kim, L. Nitschke, M. Kim, J.M. Scott, Y. Kamimura, L.L. Lanier, and S. Kim, Epigenetic modification and antibody-dependent expansion of memory-like NK cells in human cytomegalovirus-infected individuals. *Immunity*, 2015. 42(3): p. 431-42.
42. Schlums, H., F. Cichocki, B. Tesi, J. Theorell, V. Beziat, T.D. Holmes, H. Han, S.C. Chiang, B. Foley, K. Mattsson, S. Larsson, M. Schaffer, K.J. Malmberg, H.G. Ljunggren, J.S. Miller, and Y.T. Bryceson, Cytomegalovirus infection drives adaptive epigenetic diversification of NK cells with altered signaling and effector function. *Immunity*, 2015. 42(3): p. 443-56.
43. Ellis, T.M. and R.I. Fisher, Functional heterogeneity of Leu 19<sup>bright</sup>+ and Leu 19<sup>dim</sup>+ lymphokine-activated killer cells. *J Immunol*, 1989. 142(8): p. 2949-54.
44. Ivarsson, M.A., N. Stiglund, N. Marquardt, M. Westgren, S. Gidlof, and N.K. Bjorkstrom, Composition and dynamics of the uterine NK cell KIR repertoire in menstrual blood. *Mucosal Immunol*, 2017. 10(2): p. 322-331.
45. Bjorkstrom, N.K., P. Riese, F. Heuts, S. Andersson, C. Fauriat, M.A. Ivarsson, A.T. Bjorklund, M. Flodstrom-Tullberg, J. Michaelsson, M.E. Rottenberg, C.A. Guzman, H.G. Ljunggren, and K.J. Malmberg, Expression patterns of NKG2A, KIR, and CD57 define a process of CD56dim NK-cell differentiation uncoupled from NK-cell education. *Blood*, 2010. 116(19): p. 3853-64.
46. Lopez-Verges, S., J.M. Milush, B.S. Schwartz, M.J. Pando, J. Jarjoura, V.A. York, J.P. Houchins, S. Miller, S.M. Kang, P.J. Norris, D.F. Nixon, and L.L. Lanier, Expansion of a unique CD57NKG2Chi natural killer cell subset during acute human cytomegalovirus infection. *Proc Natl Acad Sci U S A*, 2011. 108(36): p. 14725-32.
47. Della Chiesa, M., M. Falco, M. Podesta, F. Locatelli, L. Moretta, F. Frassoni, and A. Moretta, Phenotypic and functional heterogeneity of human NK cells developing after umbilical cord blood transplantation: a role for human cytomegalovirus? *Blood*, 2012. 119(2): p. 399-410.
48. Muntasell, A., M. Lopez-Montanes, A. Vera, G. Heredia, N. Romo, J. Penafiel, M. Moraru, J. Vila, C. Vilches, and M. Lopez-Botet, NKG2C zygosity influences CD94/NKG2C receptor function and the NK-cell compartment redistribution in response to human cytomegalovirus. *Eur J Immunol*, 2013. 43(12): p. 3268-78.
49. Guma, M., C. Cabrera, I. Erkizia, M. Bofill, B. Clotet, L. Ruiz, and M. Lopez-Botet, Human cytomegalovirus infection is associated with increased proportions of NK cells that express the CD94/NKG2C receptor in aviremic HIV-1-positive patients. *J Infect Dis*, 2006. 194(1): p. 38-41.
50. Wu, Z., C. Sinzger, G. Frascaroli, J. Reichel, C. Bayer, L. Wang, R. Schirmbeck, and T. Mertens, Human cytomegalovirus-induced NKG2C(hi) CD57(hi) natural killer cells are effectors dependent on humoral antiviral immunity. *J Virol*, 2013. 87(13): p. 7717-25.
51. Luetke-Eversloh, M., Q. Hammer, P. Durek, K. Nordstrom, G. Gasparoni, M. Pink, A. Hamann, J. Walter, H.D. Chang, J. Dong, and C. Romagnani, Human cytomegalovirus drives epigenetic imprinting of the IFNG locus in NKG2Chi natural killer cells. *PLoS Pathog*, 2014. 10(10): p. e1004441.
52. Lopez-Verges, S., J.M. Milush, S. Pandey, V.A. York, J. Arakawa-Hoyt, H. Pircher, P.J. Norris, D.F. Nixon, and L.L. Lanier, CD57 defines a functionally distinct population of mature NK cells in the human CD56dimCD16+ NK-cell subset. *Blood*, 2010. 116(19): p. 3865-74.
53. Nielsen, C.M., M.J. White, M.R. Goodier, and E.M. Riley, Functional Significance of CD57 Expression on Human NK Cells and Relevance to Disease. *Front Immunol*, 2013. 4: p. 422.
54. Nilsson, N. and H. Carlsten, Estrogen induces suppression of natural killer cell cytotoxicity and augmentation of polyclonal B cell activation. *Cell Immunol*, 1994. 158(1): p. 131-9.
55. Hao, S., P. Li, J. Zhao, Y. Hu, and Y. Hou, 17beta-estradiol suppresses cytotoxicity and proliferative capacity of murine splenic NK1.1+ cells. *Cell Mol Immunol*, 2008. 5(5): p. 357-64.

56. Feyaerts, D., T. Kuret, B. van Cranenbroek, S. van der Zeeuw-Hingrez, O.W.H. van der Heijden, A. van der Meer, I. Joosten, and R.G. van der Molen, Endometrial natural killer (NK) cells reveal a tissue-specific receptor repertoire. *Hum Reprod*, 2018. 33(3): p. 441-451.
57. Wu, C., D.A. Espinoza, S.J. Koelle, D. Yang, L. Truitt, H. Schlums, B.A. Lafont, J.K. Davidson-Moncada, R. Lu, A. Kaur, Q. Hammer, B. Li, S. Panch, D.A. Allan, R.E. Donahue, R.W. Childs, C. Romagnani, Y.T. Bryceson, and C.E. Dunbar, Clonal expansion and compartmentalized maintenance of rhesus macaque NK cell subsets. *Sci Immunol*, 2018. 3(29).
